# Supplementary material
Source: PubMed Central journal article supplement (PMC8109274)
Supplement: NIHMS1669129-supplement-9.pdf [file NIHMS1669129-supplement-9.pdf]

| Patient ID | % Ki67+ HSC | % Ki67+ CMP | % Ki67+ GMP | Group   | Age | Sex | Serum total cholesterol [mg/dl] |
|------------|-------------|-------------|-------------|---------|-----|-----|---------------------------------|
| #1         | 6.19        | 16.6        | 26.9        | control | 59  | M   | N/A                             |
| #2         | 22.9        | 28.6        | 38.8        | control | 62  | F   | N/A                             |
| #3         | 12.5        | 41.2        | 53.3        | control | 59  | M   | N/A                             |
| #4         | 11.6        | 19.8        | 26          | control | 60  | M   | N/A                             |
| #5         | 13.9        | 22.3        | 32.9        | control | 63  | M   | N/A                             |
| #6         | 3.59        | 20.3        | 26.8        | control | 63  | M   | N/A                             |
| #7         | 8.18        | 20          | 22.4        | control | 63  | M   | N/A                             |
| #8         | 25.3        | 30.9        | 40.3        | control | 68  | F   | N/A                             |
| #9         | 10.1        | 31.4        | 37.3        | control | 72  | F   | 123                             |
| #10        | 24.5        | 45.9        | 58.3        | athero  | 56  | M   | 100                             |
| #11        | 29          | 44.1        | 63.5        | athero  | 57  | M   | 100                             |
| #12        | 21.5        | 46.1        | 52.3        | athero  | 60  | M   | 117                             |
| #13        | 48.2        | 60.2        | 74.4        | athero  | 65  | M   | 90                              |
| #14        | 18.5        | 36.3        | 49.4        | athero  | 66  | M   | 65                              |
| #15        | 42.9        | 37.5        | 83.3        | athero  | 68  | F   | 82                              |
| #16        | 22.7        | 50          | 57.1        | athero  | 68  | M   | 101                             |
| #17        | 47.4        | 66.7        | 58.3        | athero  | 69  | M   | 82                              |
| #18        | 24.3        | 47.9        | 56.6        | athero  | 72  | M   | 45                              |
| #19        | 36.3        | 39.1        | 48.6        | athero  | 75  | F   | N/A                             |

**Table S1. Measurements and characteristics of patients in the human control and atherosclerosis cohorts.** Related to figure 2. Patient IDs are listed along with the percentage of Ki67<sup>+</sup> HSCs, CMPs, GMPs, age, sex and total serum cholesterol.

| <b>Symbol</b> | <b>Parameter description</b>                                                 | <b>Baseline value</b>                                              |
|---------------|------------------------------------------------------------------------------|--------------------------------------------------------------------|
| $\bar{b}$     | Average baseline HSC proliferation rate                                      | 1/(28 days)                                                        |
| $T$           | Age of onset for elevated HSC proliferation rate                             | 40 years<br>(McGill et al., 2000)                                  |
| $F$           | Detection frequency (minimum VAF)                                            | 2%<br>(Jaiswal et al., 2014)                                       |
| $f^*$         | Frequency of the largest driver clone at age $t^* = 50$ years                | 0.51% (Razavi et al., 2019;<br>Young et al., 2016)                 |
| $s$           | Selective effect of the largest driver clone                                 | 0.3% (Watson et al., 2020;<br>Buscarlet et al., 2017)              |
| $N$           | Number of HSCs                                                               | $10^4$ – $10^5$ cells (Zink et al.,<br>2017; Lee-Six et al., 2018) |
| $u$           | Mean number of neutral mutations acquired by each daughter cell per division | 1.5 mutations (Lee-Six et al,<br>2018; Osorio et al, 2018)         |

**Table S2. Human model parameters and typical values.** Related to figure 3. Symbols are listed as used throughout the main text, figures, and supporting materials. Baseline values are used for all analyses unless otherwise noted and are taken from the referenced sources.

| <b>Parameter description</b>                | <b>HSCs</b>                              | <b>Neutrophils</b>               | <b>Monocytes</b>                 |
|---------------------------------------------|------------------------------------------|----------------------------------|----------------------------------|
| Proliferation rate                          | 1/(17.5 days)<br>(Abkowitz et al., 2002) | 0                                | 0                                |
| Mean lifespan                               | N/A                                      | 0.45 days<br>(Basu et al., 2002) | 0.84 days<br>(Yona et al., 2013) |
| Population size                             | $10^4$ cells                             | $10^6$ cells                     | $10^{5.5}$ cells                 |
| Initial <i>Tet2</i> <sup>-/-</sup> fraction | 18%                                      | 19%                              | 17%                              |

**Table S3. Mouse model parameters.** Related to figure 5. Typical values for each of three cell types (HSCs, neutrophils, and monocytes) are shown.
