# Supplementary material
Source: PubMed Central journal article supplement (PMC8109274)

**Figure S2**

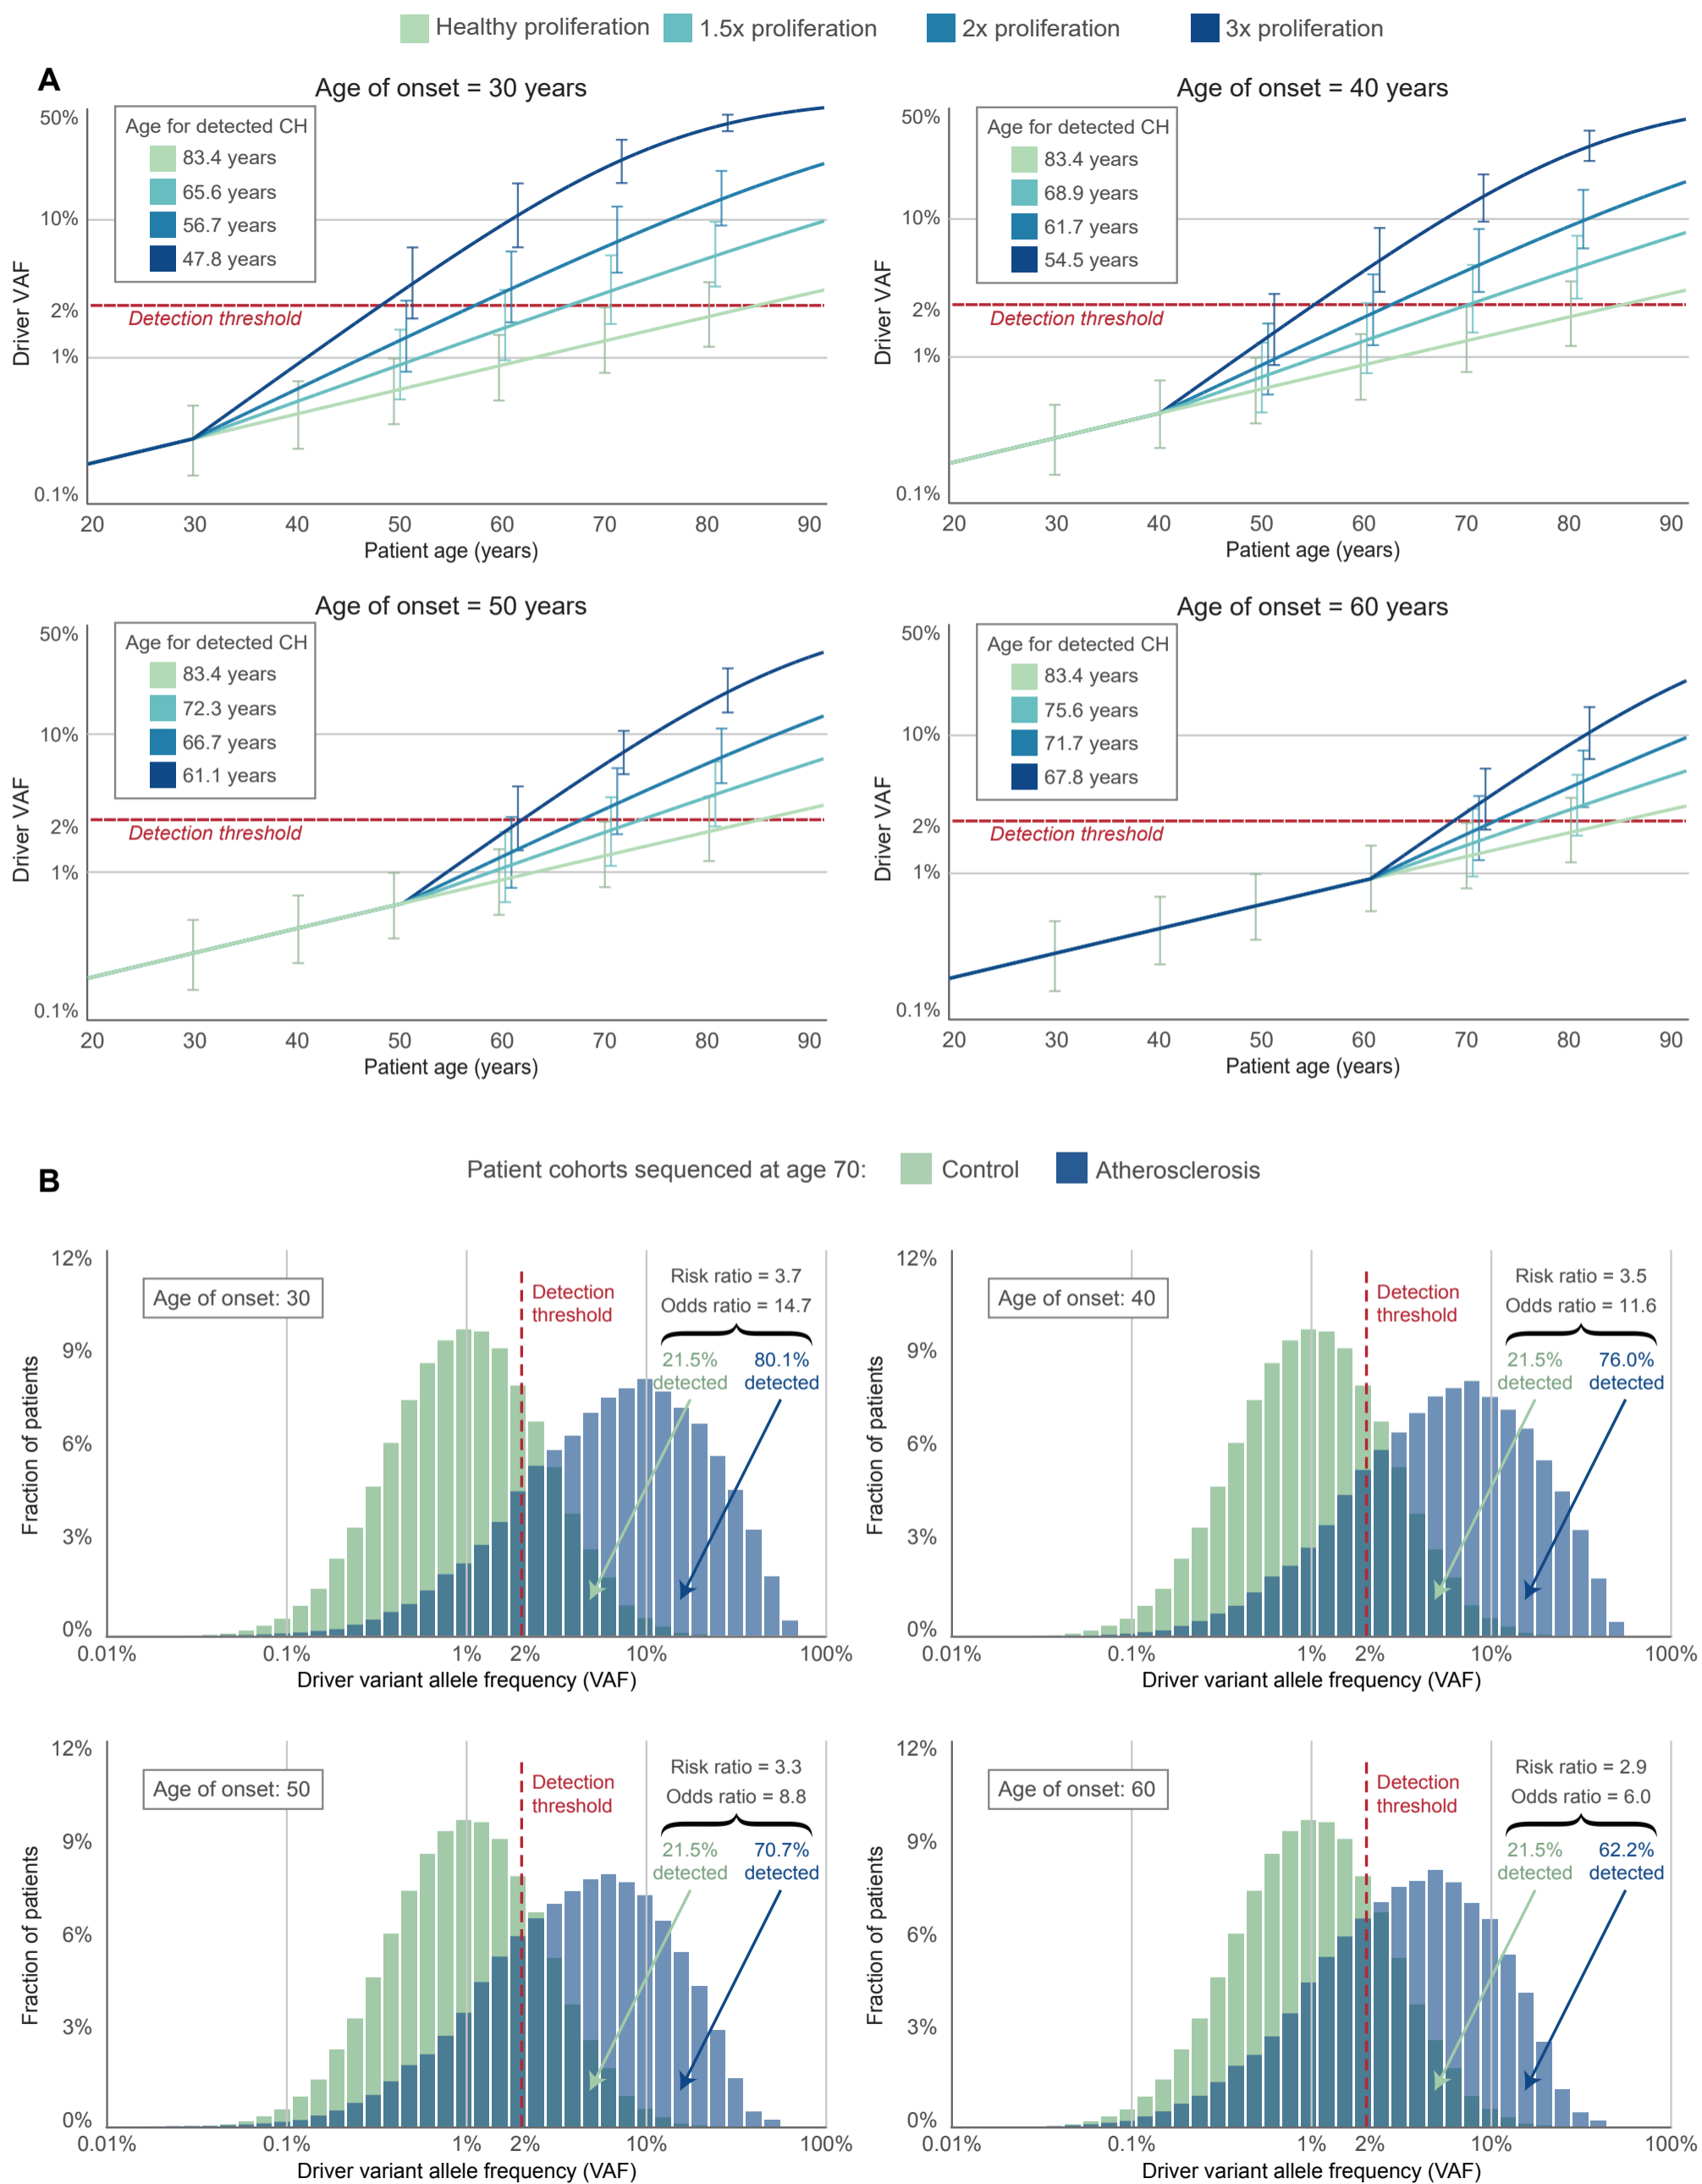

Supplement: NIHMS1669129-supplement-3.pdf [file NIHMS1669129-supplement-3.pdf]

**Figure S3**

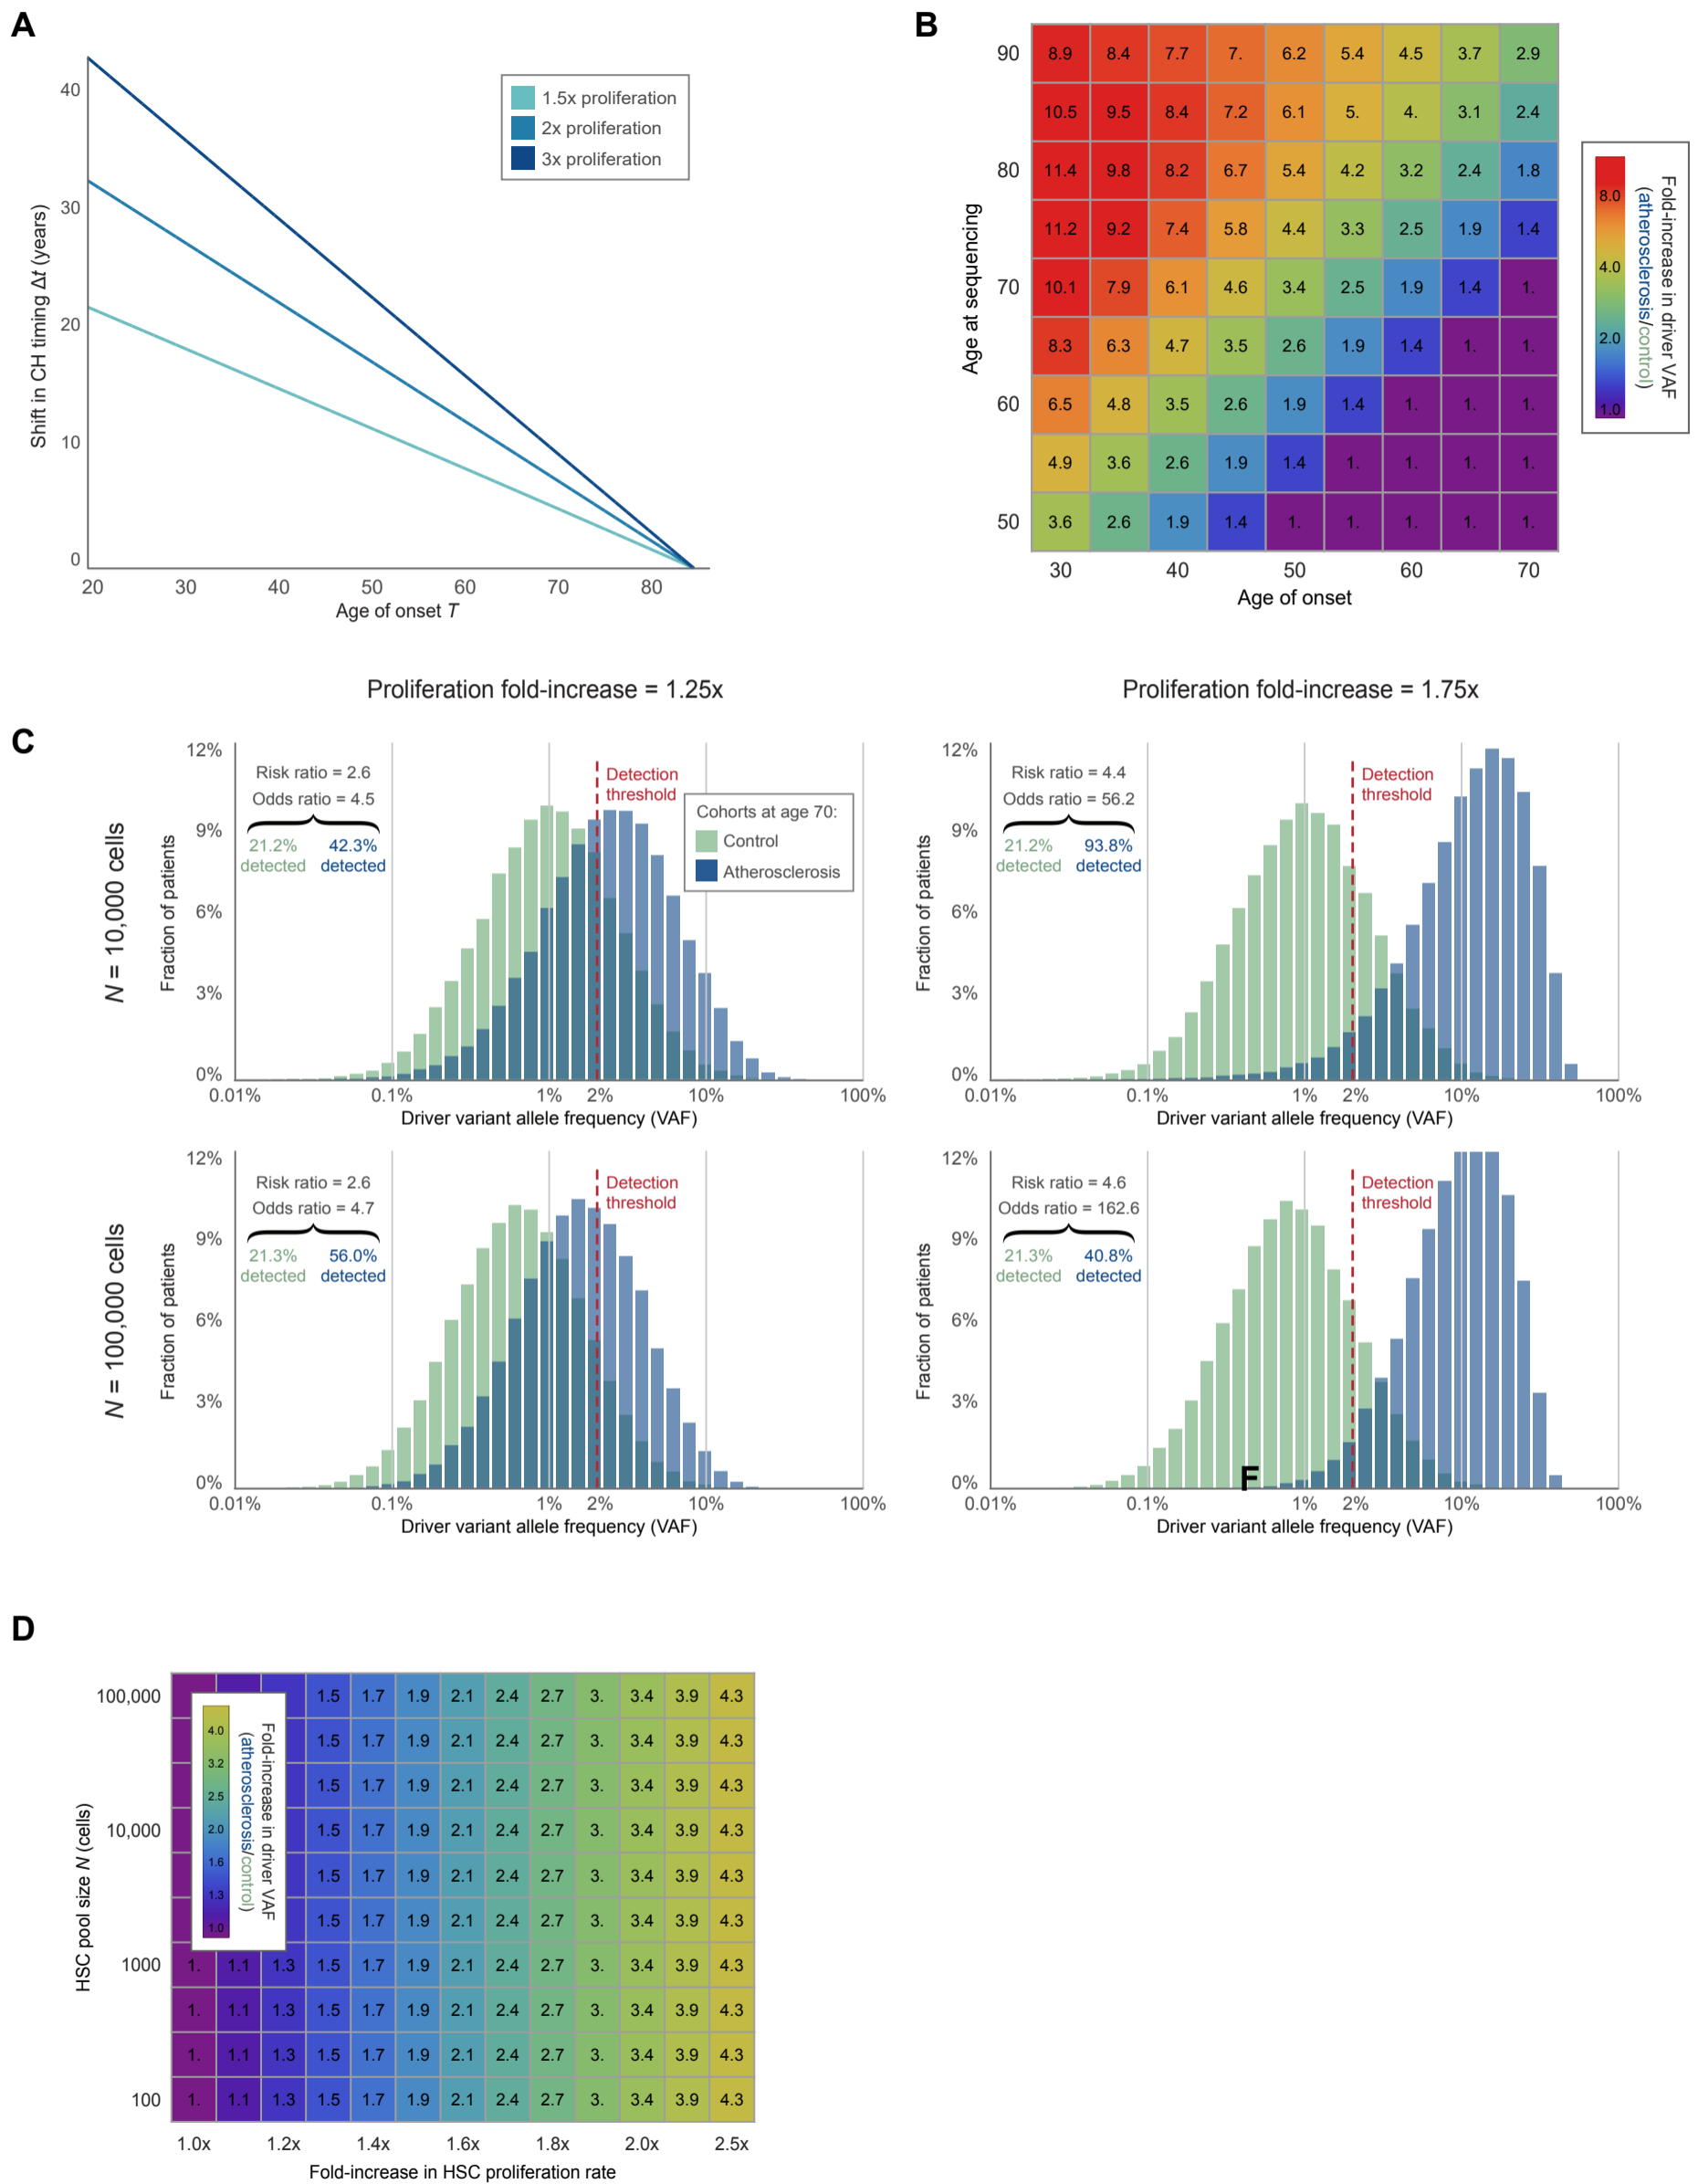

Supplement: NIHMS1669129-supplement-4.pdf [file NIHMS1669129-supplement-4.pdf]

**Figure S4**

**A**

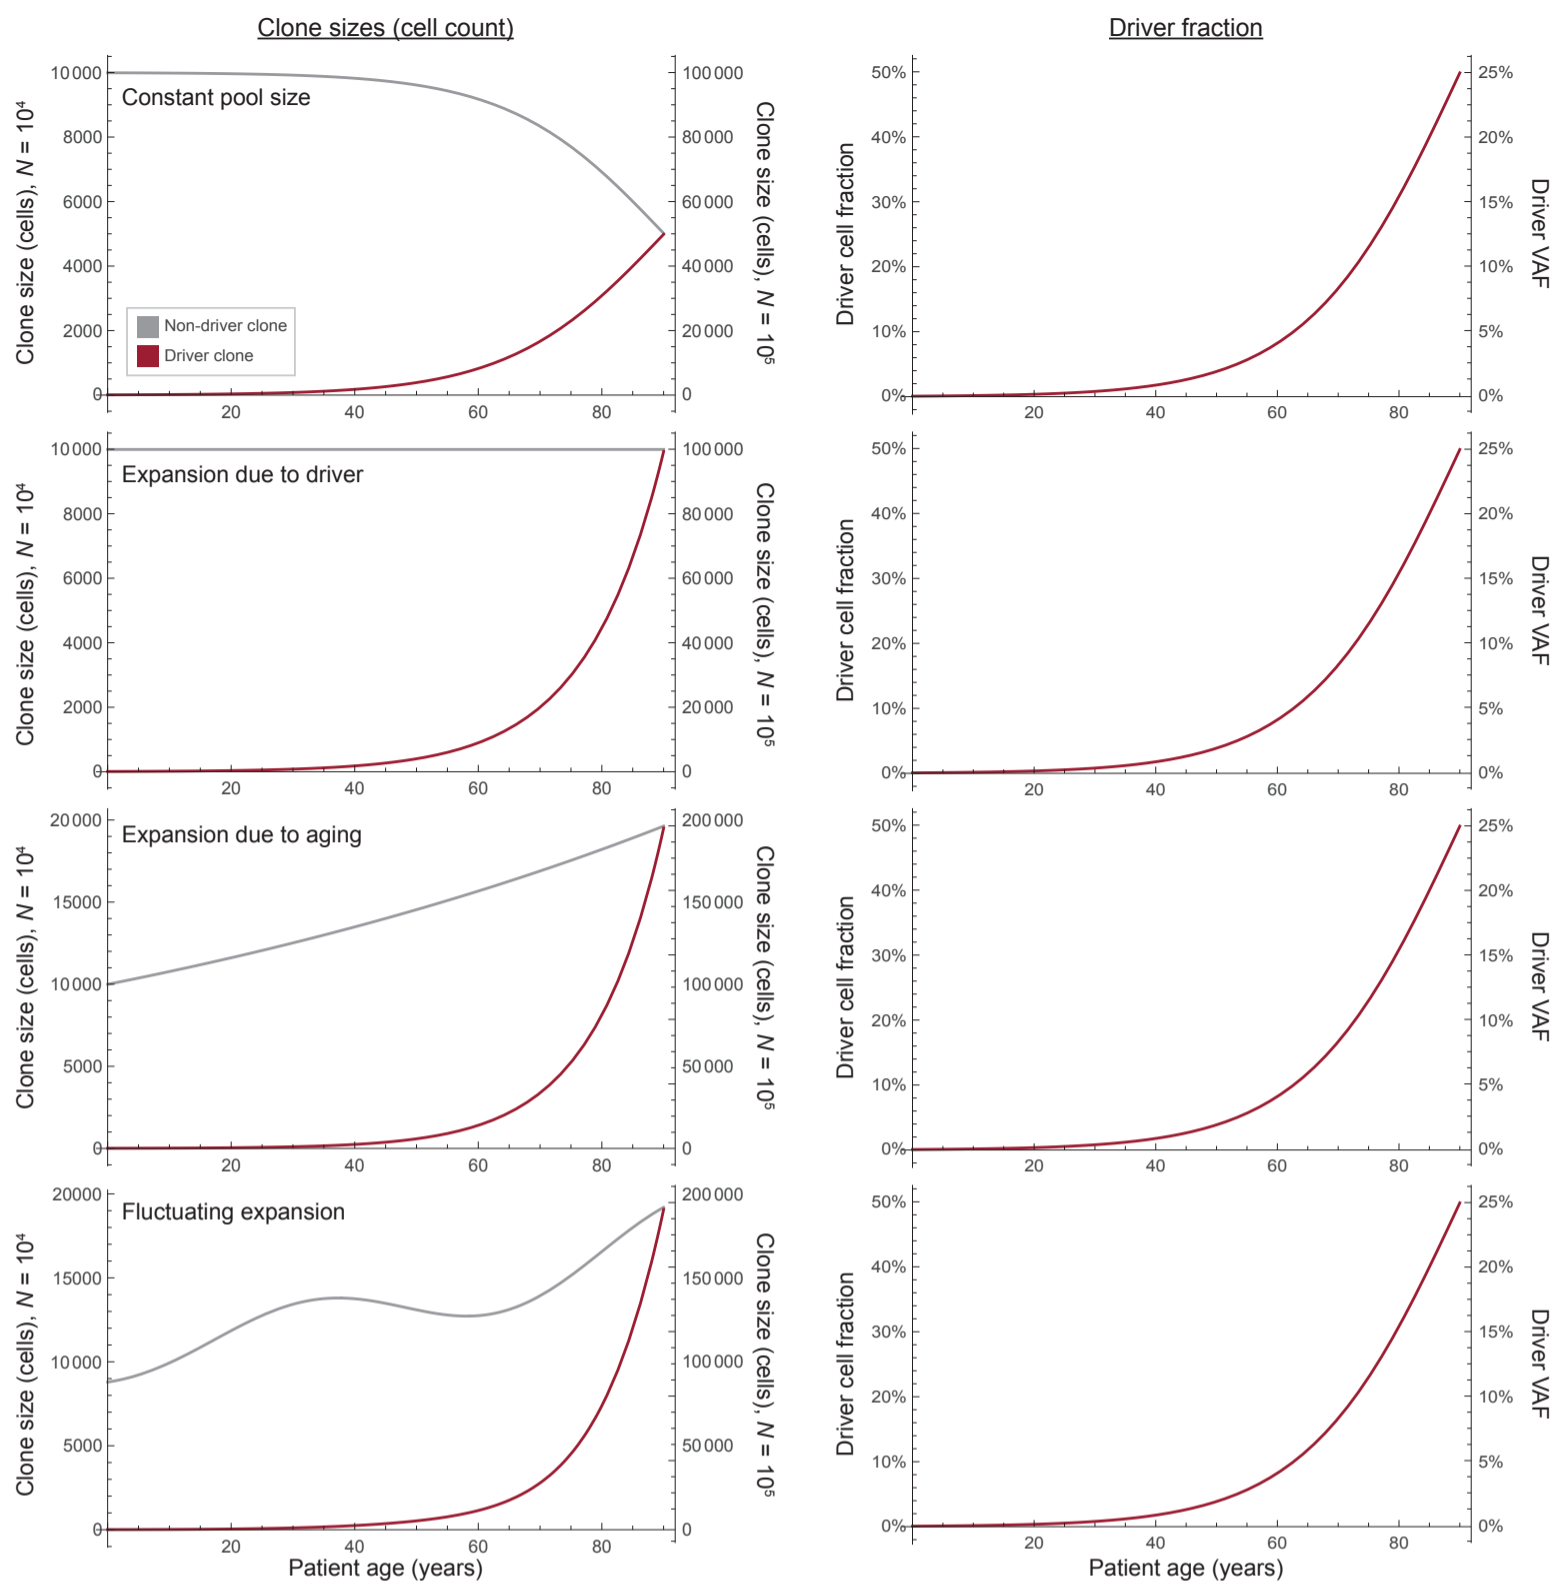

**B**

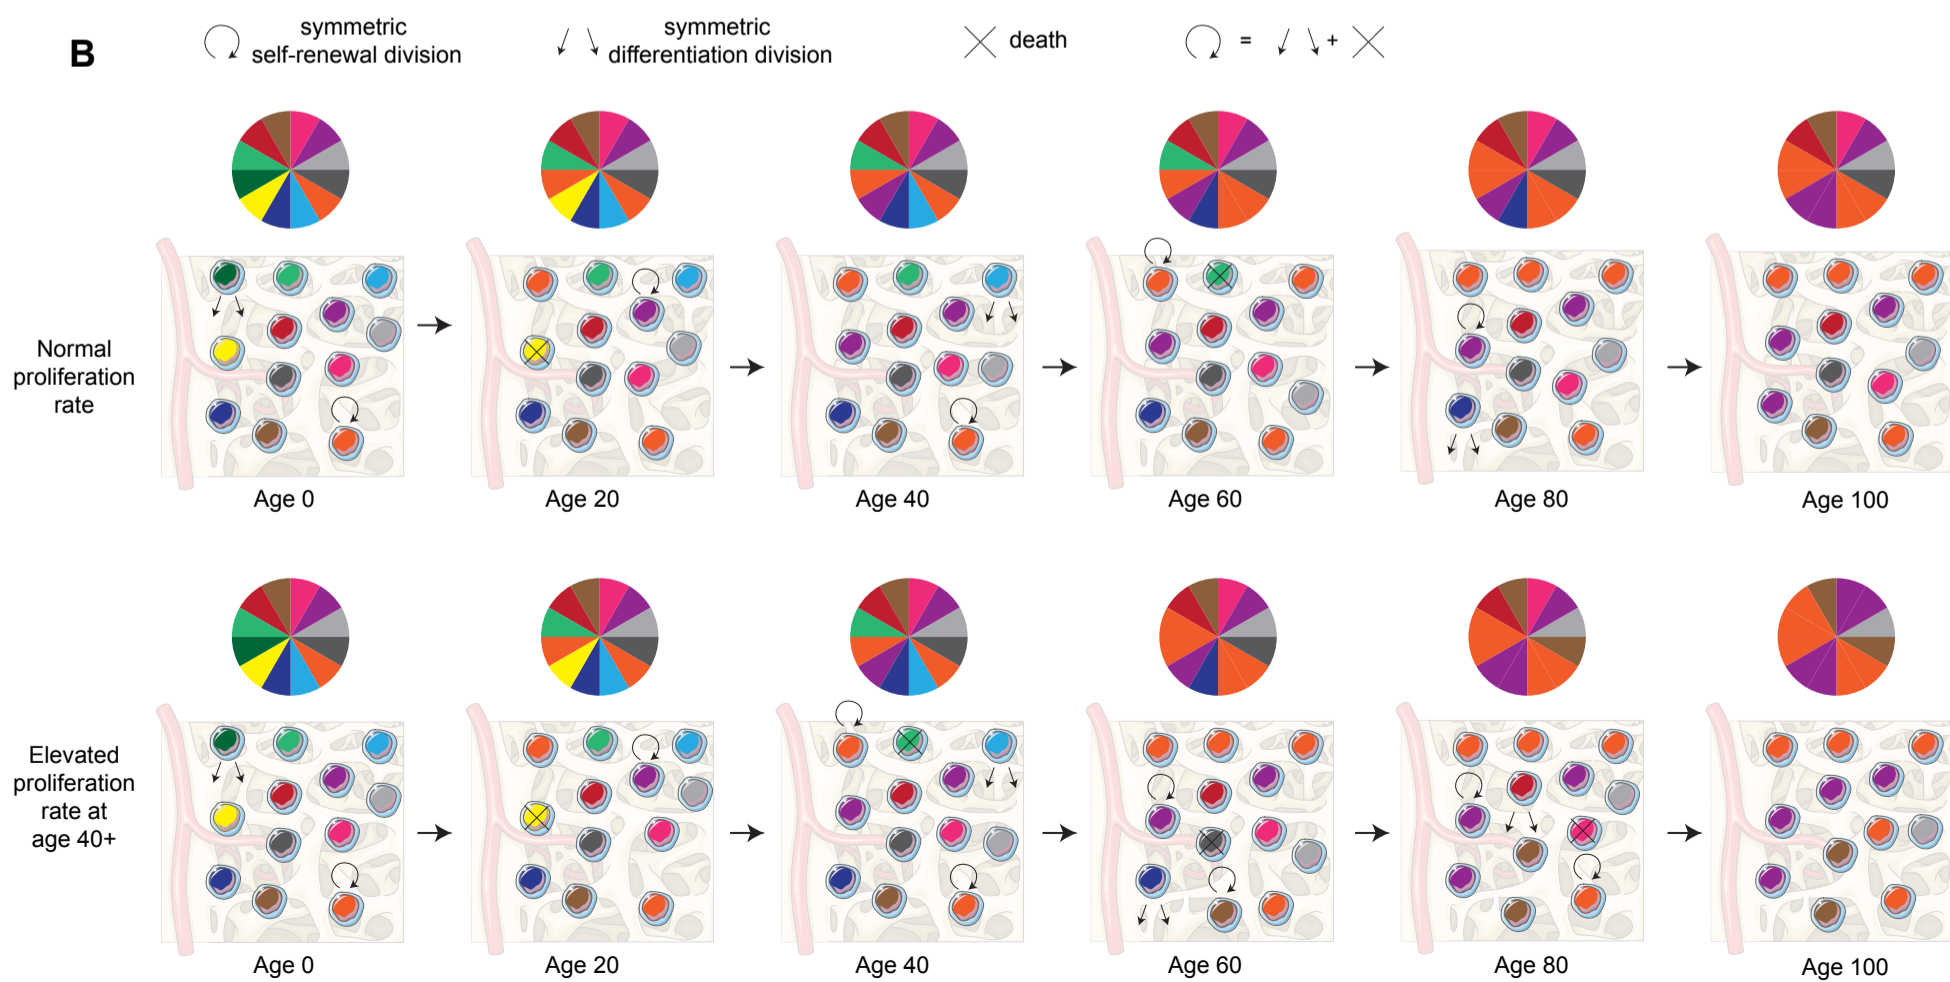

Supplement: NIHMS1669129-supplement-5.pdf [file NIHMS1669129-supplement-5.pdf]

**Figure S5**

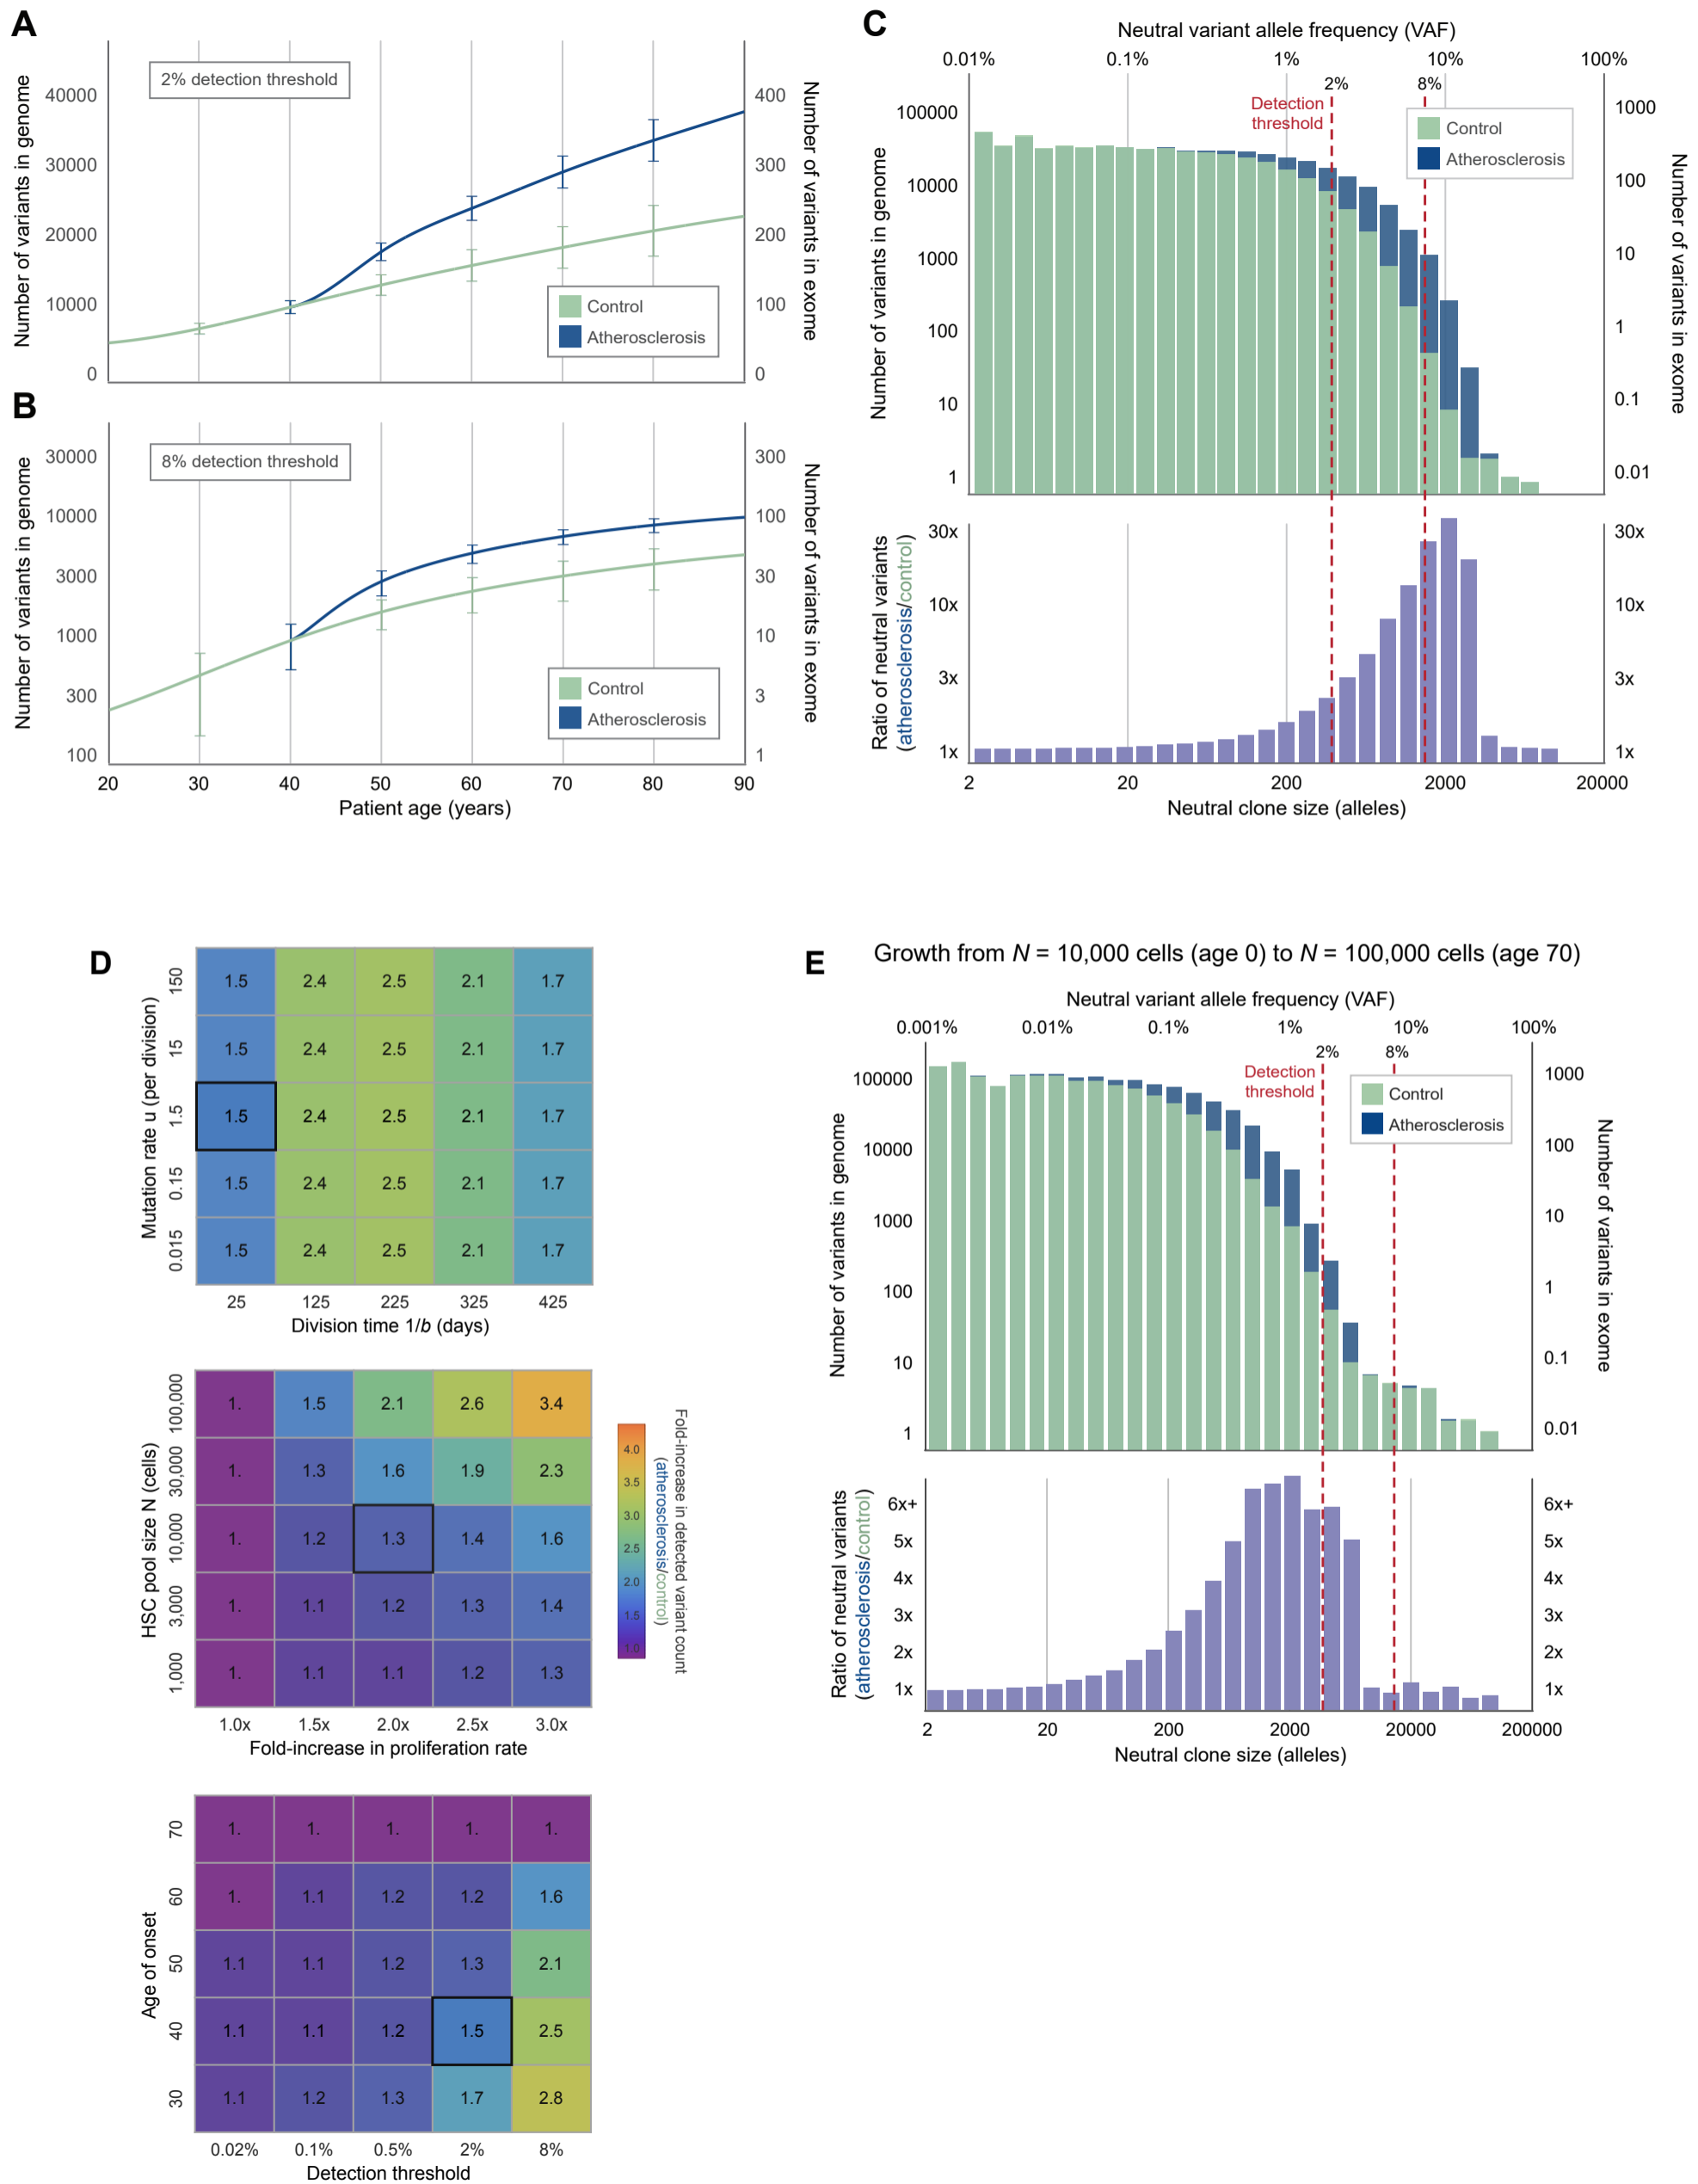

Supplement: NIHMS1669129-supplement-6.pdf [file NIHMS1669129-supplement-6.pdf]

Figure S6

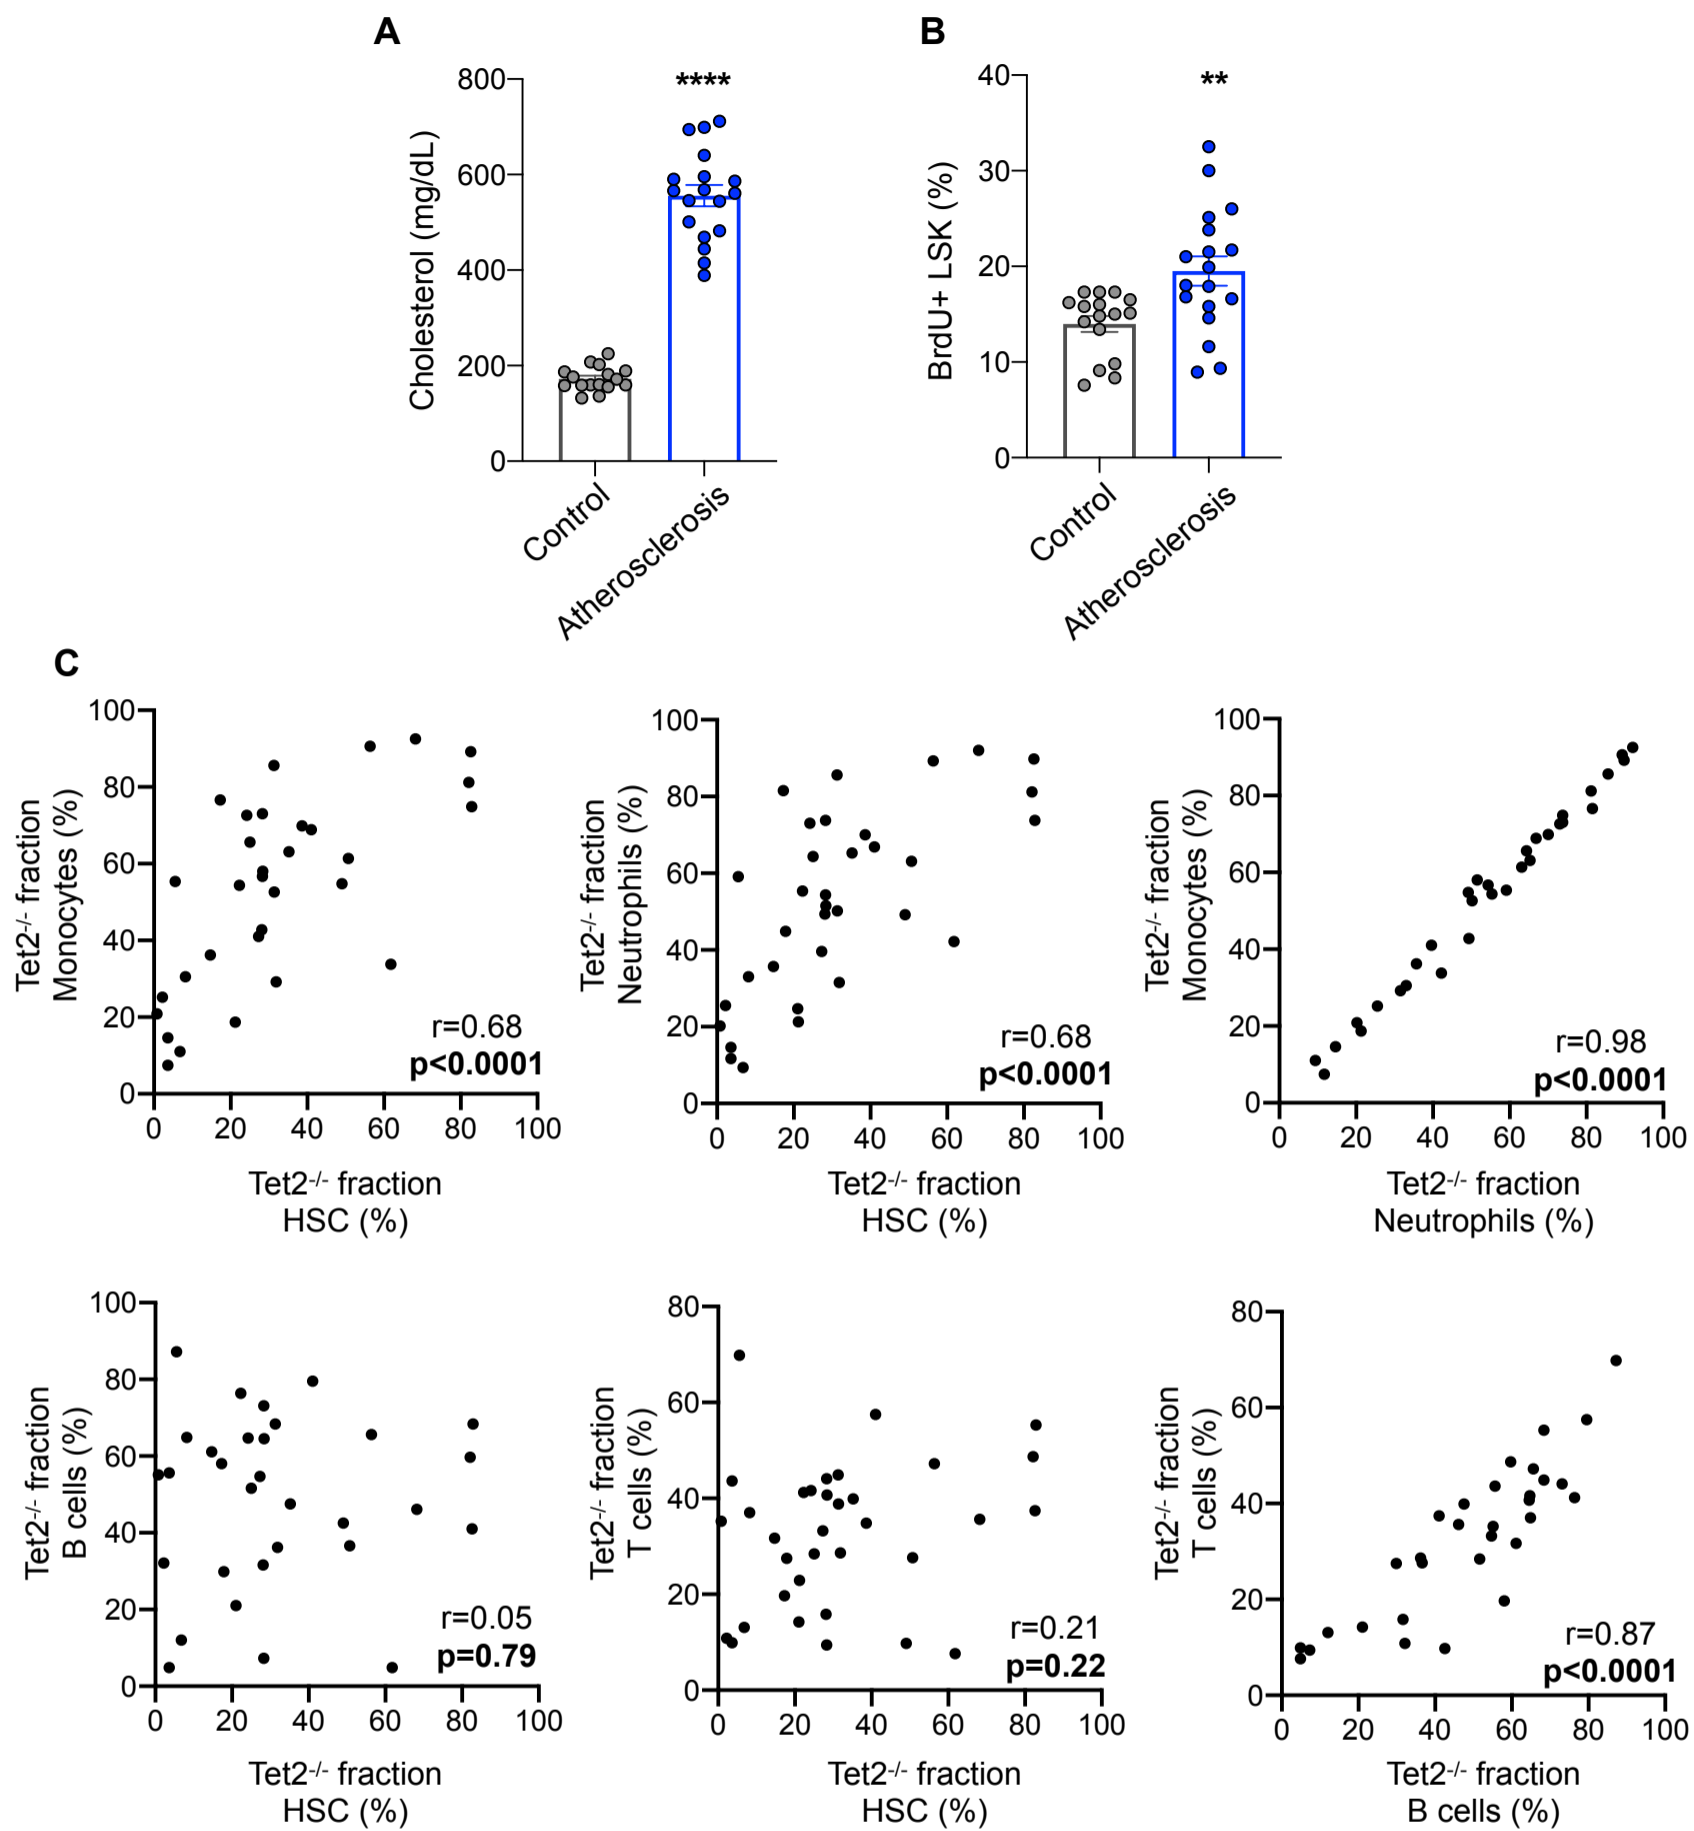

Supplement: NIHMS1669129-supplement-7.pdf [file NIHMS1669129-supplement-7.pdf]

**Figure S7**

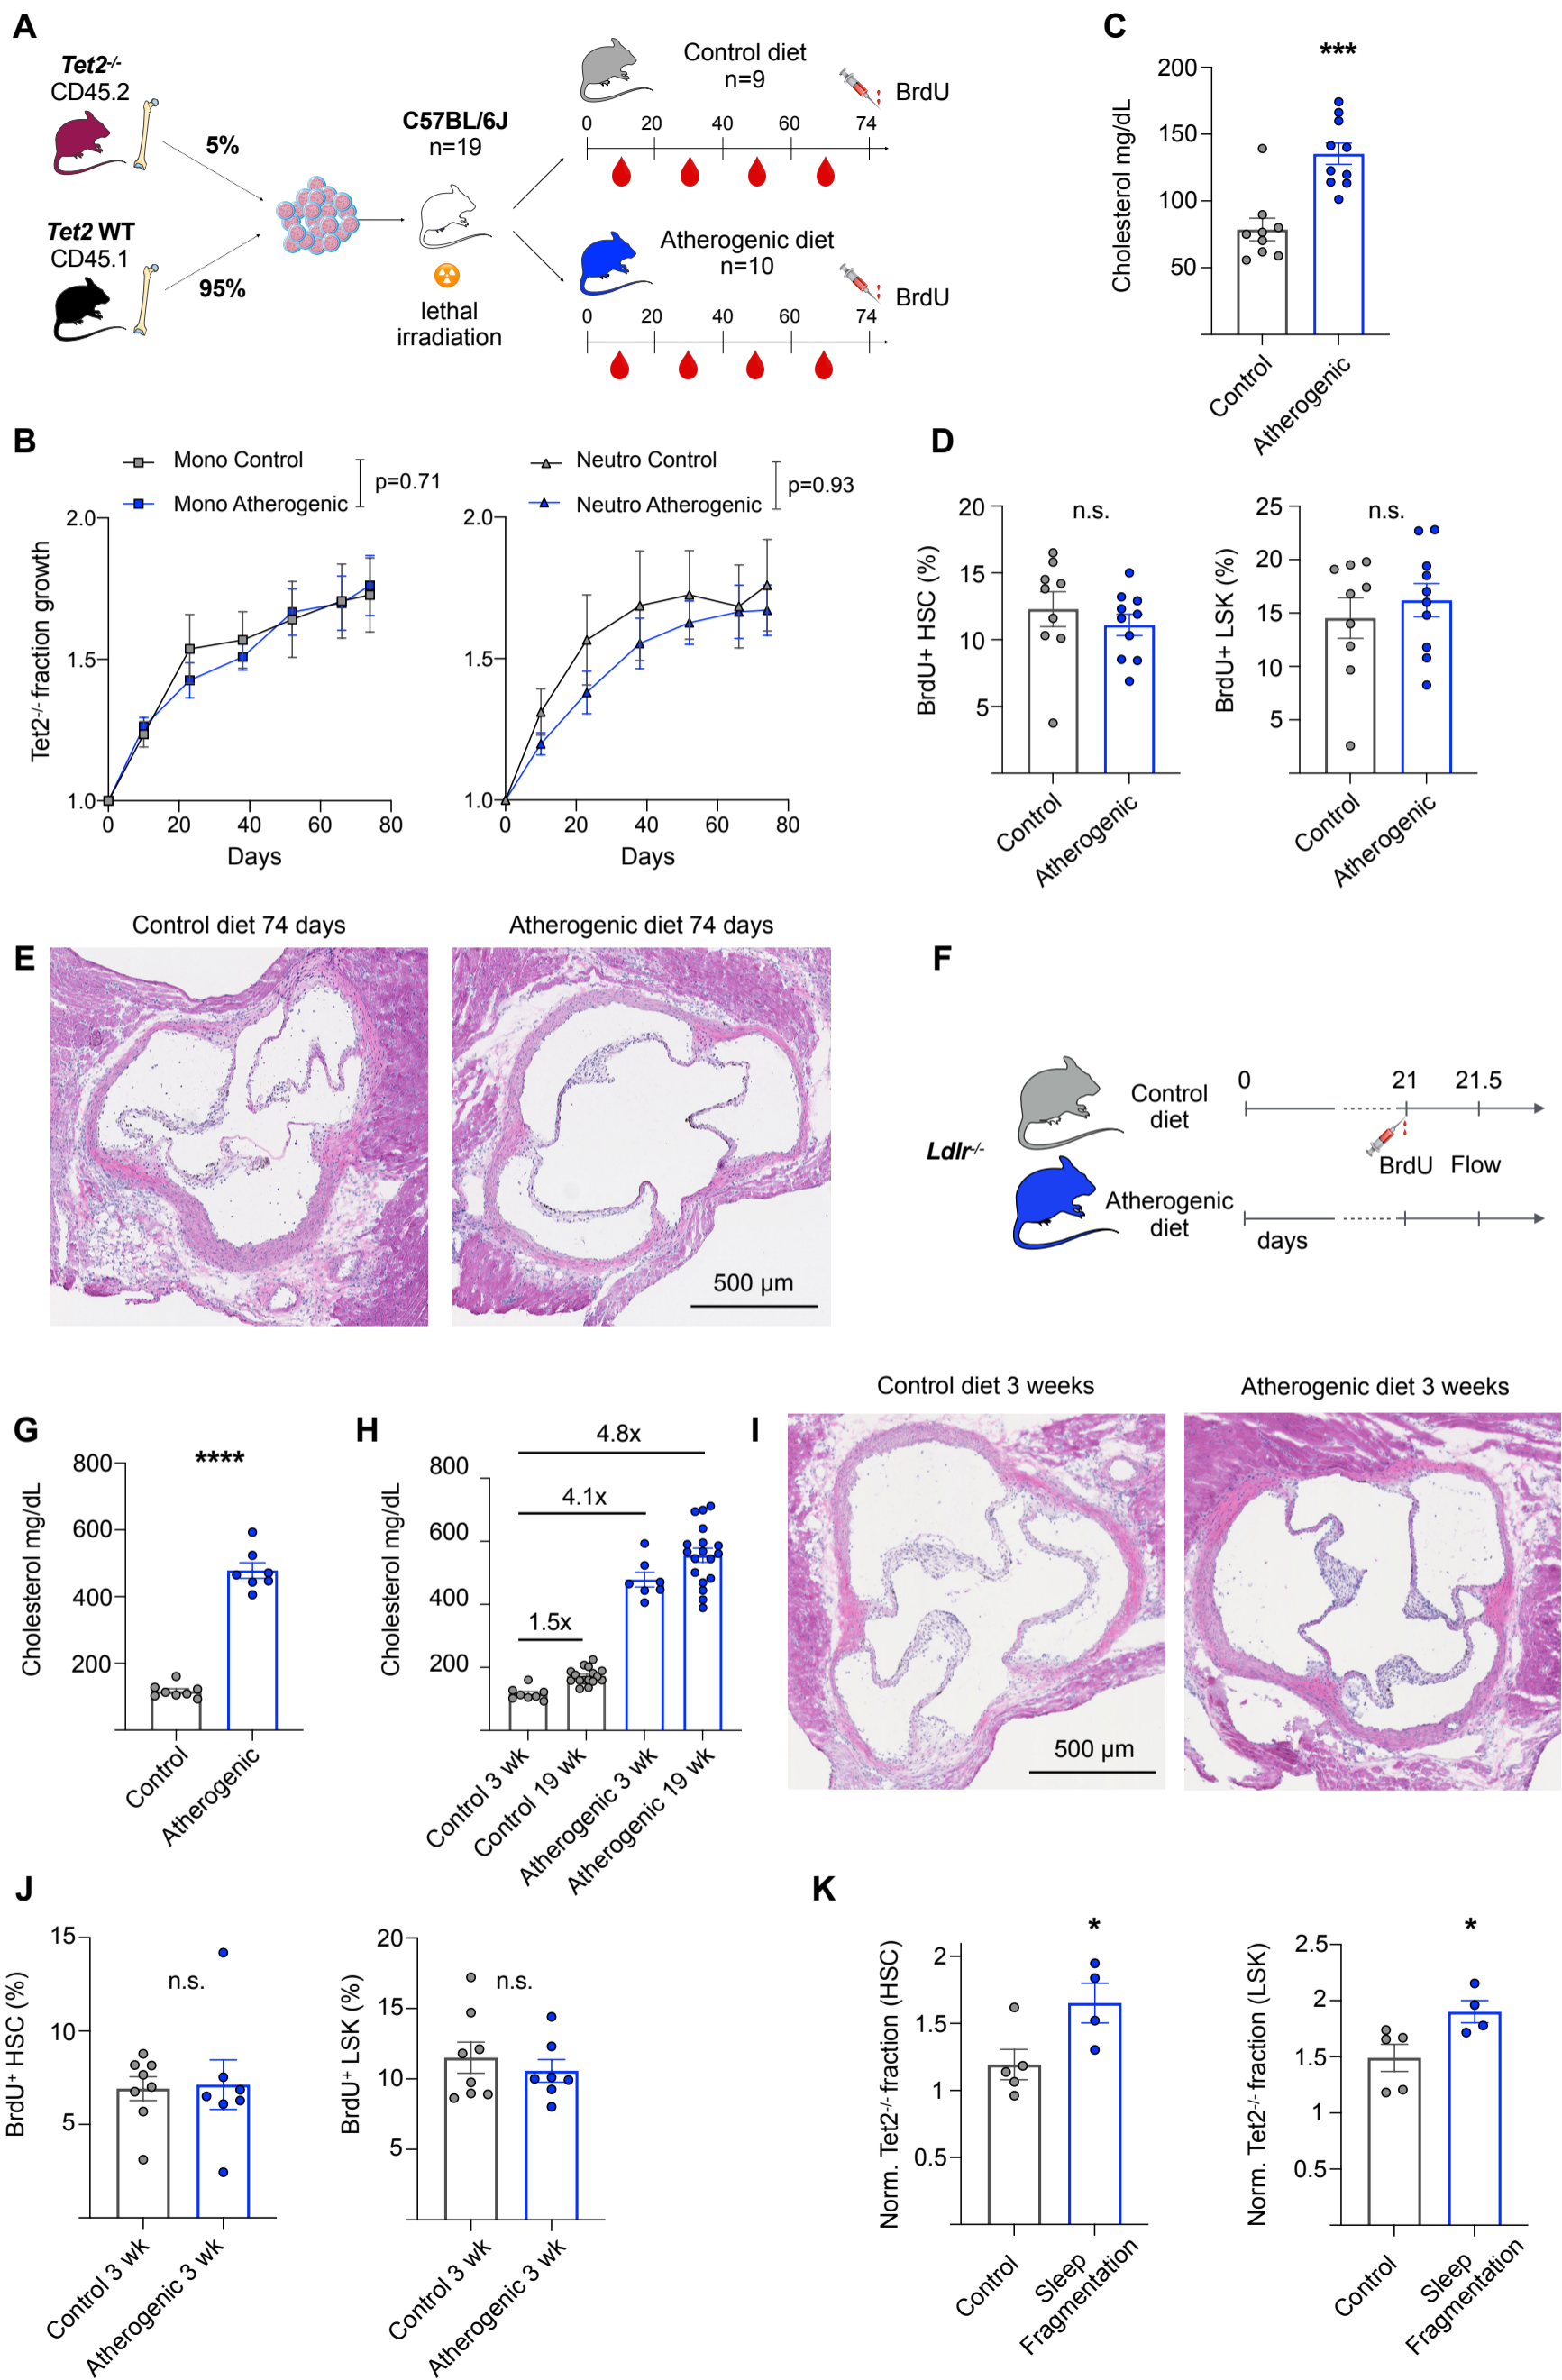

Supplement: NIHMS1669129-supplement-8.pdf [file NIHMS1669129-supplement-8.pdf]

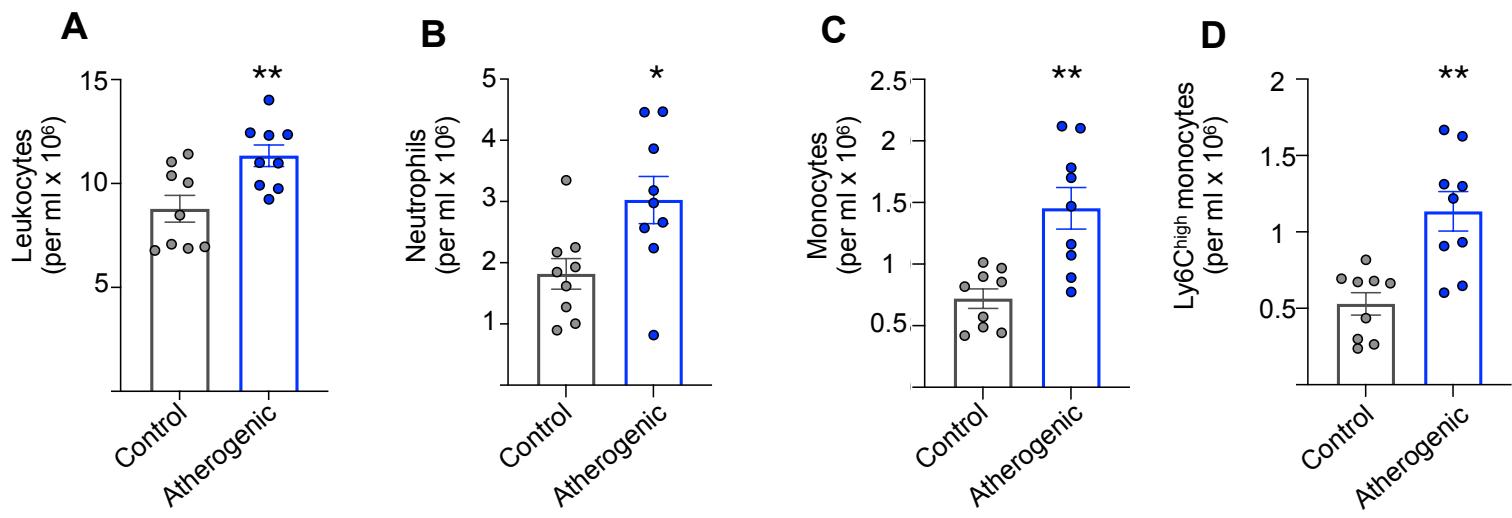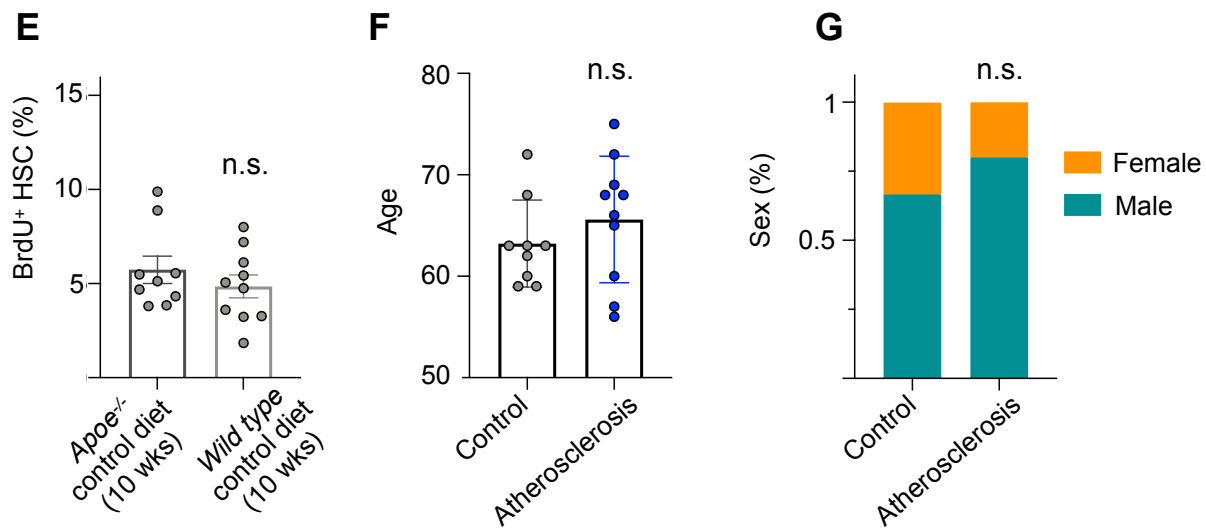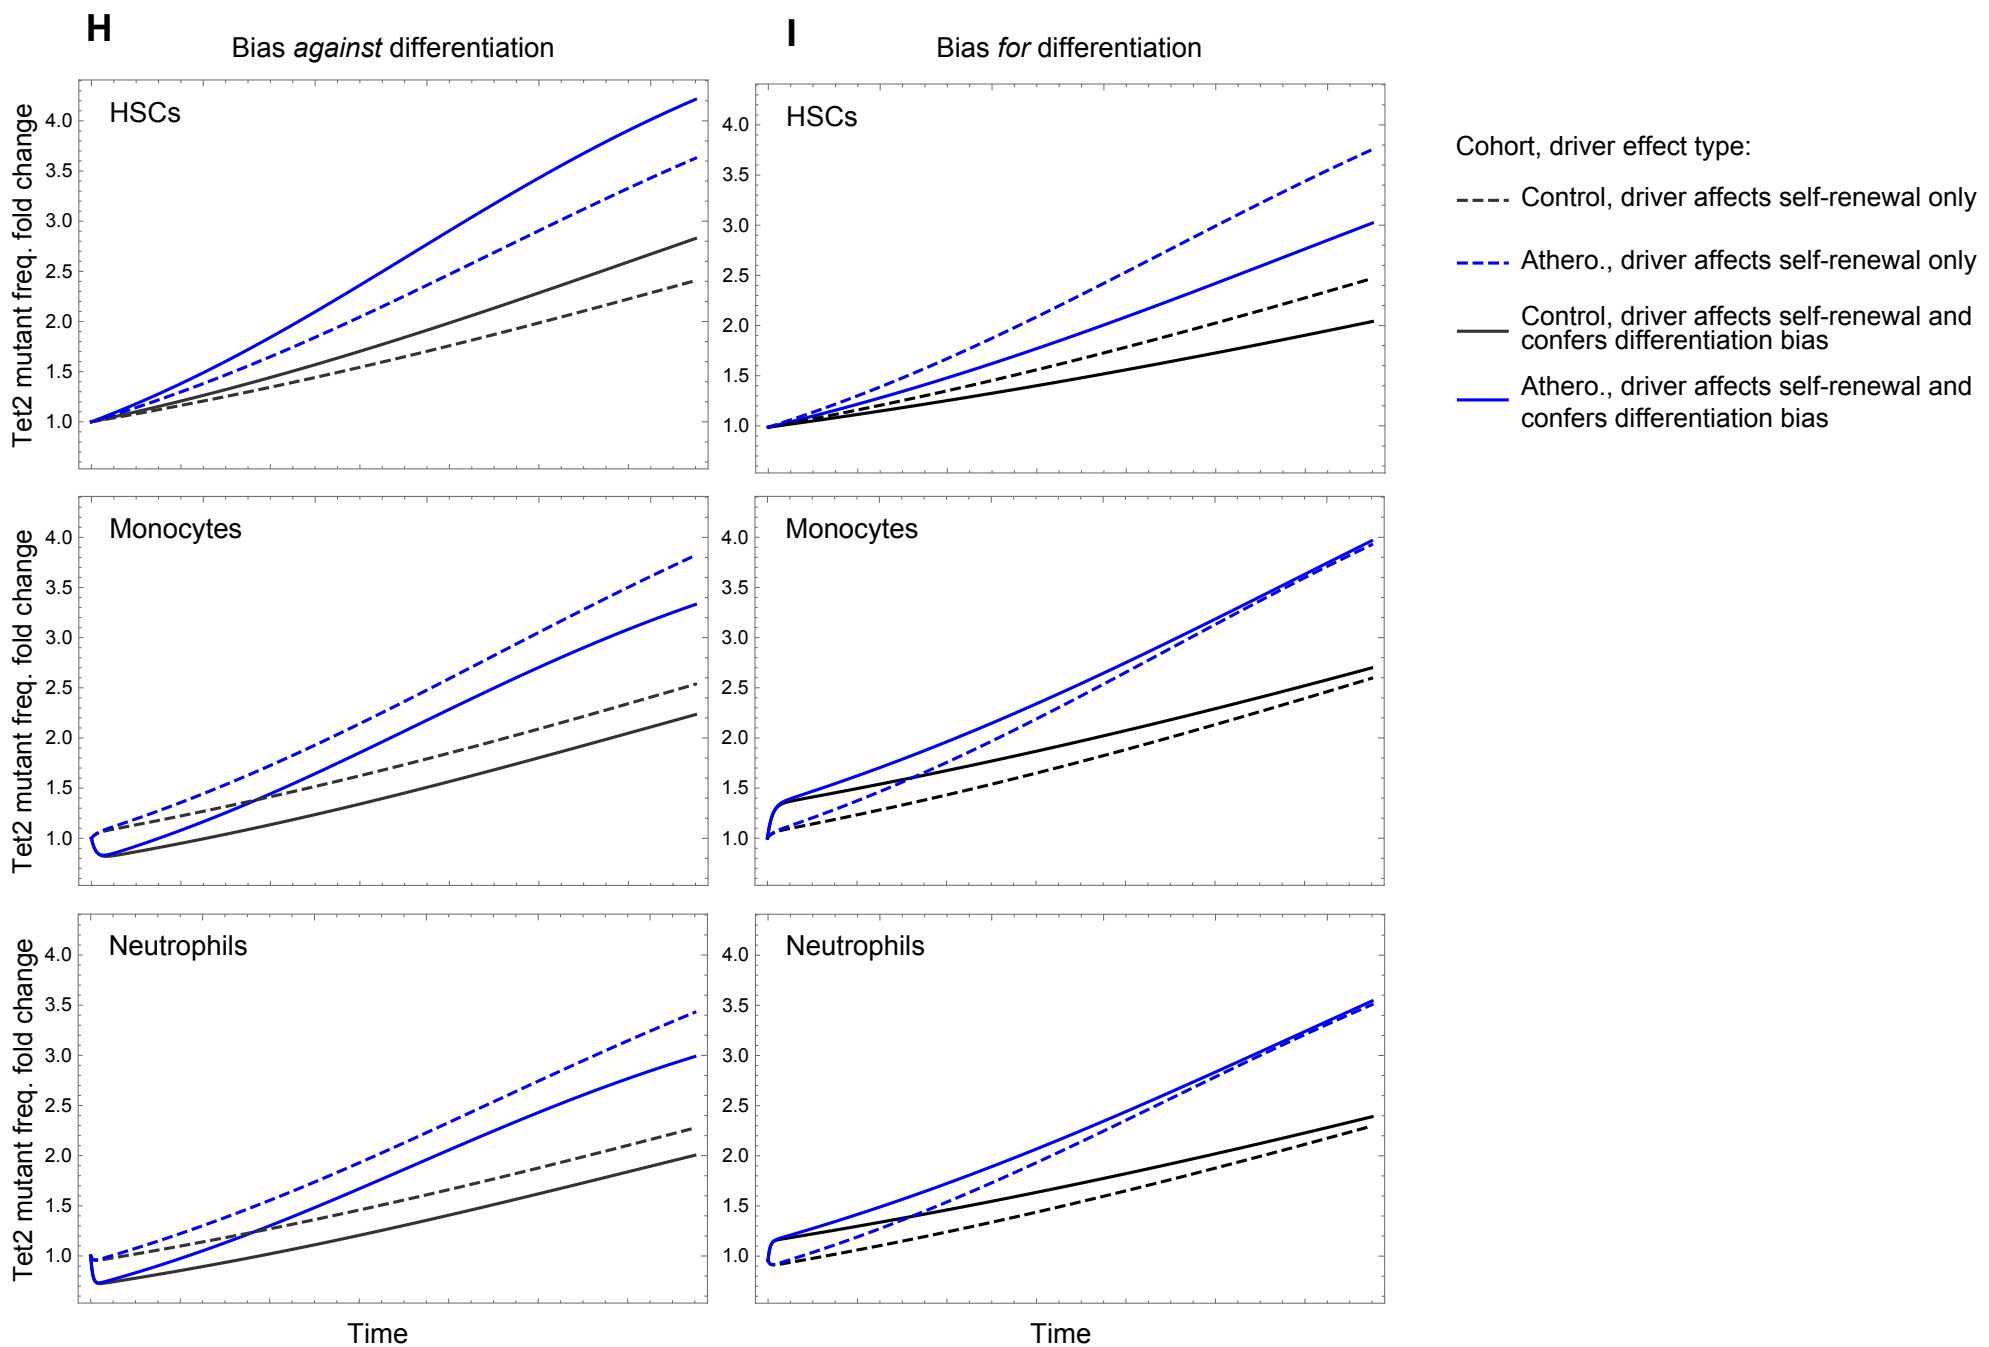

Supplement: NIHMS1669129-supplement-Figure_S1.pdf [file NIHMS1669129-supplement-Figure_S1.pdf]
